# Supplementary material
Source: MDPI journal article supplement (https://www.mdpi.com/1422-0067/15/2/1946)
Supplement: s1 [file s1]

Archive with 3 entries (3 files):
- Table S1.xls
- Supplementary Figure S1,S2.pdf
- Supplementary Table S2, S3, S4.pdf
