# Supplementary material for: Identification and Molecular Characterization of a Chitin Deacetylase from Bombyx mori Peritrophic Membrane
Source: MDPI journal article supplement (doi:10.3390/ijms15021946), 2014-01-27
Supplement: s1 [file s1]

# Supplementary Tables

**Table S2.** Summary of CDA genes in *B.mori*.

| GeneID        | Name   | Protien length | CDA Domain | Nscaf | Start   | End     | Strand | CHr | EST |
|---------------|--------|----------------|------------|-------|---------|---------|--------|-----|-----|
| BGIBMGA006213 | BmCDA1 | 539            | 193-309    | 2847  | 8094528 | 8105043 | +      | 4   | YES |
| BGIBMGA006214 | BmCDA2 | 576            | 227-363    | 2847  | 8113114 | 8118608 | +      | 4   | YES |
| BGIBMGA008988 | BmCDA3 | 414            | 76-214     | 2930  | 2479822 | 2484042 | +      | 3   | NO  |
| BGIBMGA010573 | BmCDA4 | 437            | 111-244    | 2993  | 6820022 | 6842885 | +      | 12  | NO  |
| BGIBMGA002696 | BmCDA5 | 1612           | 1277-1409  | 2529  | 3321984 | 3333702 | +      | 5   | YES |
| BGIBMGA013758 | BmCDA6 | 315            | 48-183     | 3097  | 789788  | 792617  | −      | 28  | YES |
| BGIBMGA013757 | BmCDA7 | 364            | 47-182     | 3097  | 797560  | 804535  | −      | 28  | YES |
| BGIBMGA013756 | BmCDA8 | 382            | 50-185     | 3097  | 810851  | 816660  | −      | 28  | YES |

**Table S3.** The Accession Numbers of the chitin deacetylases from different insect species.

| Protein name | Species                        | Accession No.     |
|--------------|--------------------------------|-------------------|
| BmCDA1       | <i>Bombyx mori</i>             | BGIBMGA006213 *   |
| BmCDA2       | <i>Bombyx mori</i>             | BGIBMGA006214 *   |
| BmCDA3       | <i>Bombyx mori</i>             | BGIBMGA008988 *   |
| BmCDA4       | <i>Bombyx mori</i>             | BGIBMGA010573 *   |
| BmCDA5a      | <i>Bombyx mori</i>             | BGIBMGA002696 *   |
| BmCDA5b      | <i>Bombyx mori</i>             | BGIBMGA002696 *   |
| BmCDA6       | <i>Bombyx mori</i>             | BGIBMGA013758 *   |
| BmCDA7       | <i>Bombyx mori</i>             | BGIBMGA013757 *   |
| BmCDA8       | <i>Bombyx mori</i>             | BGIBMGA013756 *   |
| DmCDA1       | <i>Drosophila melanogaster</i> | CG32209           |
| DmCDA2       | <i>Drosophila melanogaster</i> | CG8756            |
| DmCDA3       | <i>Drosophila melanogaster</i> | NP_609806         |
| DmCDA4       | <i>Drosophila melanogaster</i> | NP_728468         |
| DmCDA5a      | <i>Drosophila melanogaster</i> | NP_722589         |
| DmCDA5b      | <i>Drosophila melanogaster</i> | NP_001097045      |
| DmCDA9       | <i>Drosophila melanogaster</i> | NP_611192         |
| TcCDA1       | <i>Tribolium castaneum</i>     | ABU2522           |
| TcCDA2       | <i>Tribolium castaneum</i>     | ABU25224/ABU25225 |
| TcCDA3       | <i>Tribolium castaneum</i>     | ABW74145          |
| TcCDA4       | <i>Tribolium castaneum</i>     | ABW74146          |
| TcCDA5a      | <i>Tribolium castaneum</i>     | ABW74147          |
| TcCDA5b      | <i>Tribolium castaneum</i>     | ABW74148          |
| TcCDA6       | <i>Tribolium castaneum</i>     | ABW74149          |
| TcCDA7       | <i>Tribolium castaneum</i>     | ABW74150          |
| TcCDA8       | <i>Tribolium castaneum</i>     | ABW74151          |
| TcCDA9       | <i>Tribolium castaneum</i>     | ABW74152          |
| AaeCDA1      | <i>Aedes aegypti</i>           | XP_001656823      |
| AaeCDA2      | <i>Aedes aegypti</i>           | XP_001656821      |
| AaeCDA3      | <i>Aedes aegypti</i>           | XP_001651335      |
| AaeCDA4      | <i>Aedes aegypti</i>           | XP_001651034      |
| AaeCDA5      | <i>Aedes aegypti</i>           | XP_001663505      |

**Table S3.** *Cont.*

| Protein name | Species                  | Accession No. |
|--------------|--------------------------|---------------|
| AgCDA1       | <i>Anopheles gambiae</i> | XP_320597     |
| AgCDA2       | <i>Anopheles gambiae</i> | XP_320596     |
| AgCDA3       | <i>Anopheles gambiae</i> | XP_317336     |
| AgCDA4       | <i>Anopheles gambiae</i> | XP_310753     |
| AgCDA5       | <i>Anopheles gambiae</i> | XP_316929     |
| AmCDA1       | <i>Apis mellifera</i>    | XP_391915     |
| AmCDA2       | <i>Apis mellifera</i>    | XP_320596     |
| AmCDA3       | <i>Apis mellifera</i>    | XP_001121246  |
| AmCDA4       | <i>Apis mellifera</i>    | XP_001120478  |
| AmCDA5a      | <i>Apis mellifera</i>    | XP_624655     |
| AmCDA5b      | <i>Apis mellifera</i>    | XP_624655     |
| TnCDA9       | <i>Trichoplusia ni</i>   | AY966402      |

\* Accession No. of *Bombyx mori* CDA in the silkDB.

**Table S4.** Primers used for expression and tissue-specific expression profiles of *BmCDA7* genes.

| Purpose                                               | Sequence (5' to 3')                                                                           |
|-------------------------------------------------------|-----------------------------------------------------------------------------------------------|
| Probe synthesis for 5' RACE                           | GSP1: GGAGGAGTTCGGTGGGAGATTGA<br>GSP2: CTTTAGCCAAGACCGCCGTGAGCAGA                             |
| Probe synthesis for 3' RACE                           | GSP1: AATCTCCCACCGAACTCCTCC<br>GSP2: GTGCCCAACTGCTTCGCTG                                      |
| Probe synthesis for RT-PCR and prokaryotic expression | F: GTCAC <u>CATATG</u> AAAGAACTGCAACTTGCTACGG<br>R: CCG <u>CTCGAGT</u> TAATTAAGTCCAAATGGATTG  |
| Probe synthesis for eukaryotic expression             | F: CCGGA <u>ATT</u> CAGTATCCCGGGAGGCTTGGA<br>R: AAGGCGG <u>CCGCT</u> TAATTAAGTCCAAATGGATTGCCG |

Restriction sites are underlined; GSP: Gene specific primer; F: Forward primer; R: Reverse primer.
