# Supplementary material for: Identification and Molecular Characterization of a Chitin Deacetylase from Bombyx mori Peritrophic Membrane
Source: MDPI journal article supplement (doi:10.3390/ijms15021946), 2014-01-27
Supplement: s1 [file s1 › Table S1.xls]

## Sheet: MALDI-TOF MS analysis
MALDI-TOF MS analysis of PM trypsic peptides of B.mori
Protein name	Theoretical mass	Observed mass	Difference	Position	Sequence
H+ transporting ATP synthase beta subunit isoform 1	842.574	843.034	0.46	8-16	VGSGILAVK
	926.548	927.111	0.56	29- 37	IVAVNAVNK
	974.453	975.155	0.7	191-201	IGLFGGAGVGK
	1011.6	1012.17	0.58	123-132	IPVGAETLGR
	1263.33	1262.45	-0.88	99-110	TIAMDGTEGLVR
	1367.44	1367.56	0.13	133-144	IINVIGEPIDER
	1406.36	1406.52	0.16	215-228	AHGGYSVFAGVGER
	1435.37	1435.6	0.23	300-313	FTQAGSEVSALLGR
	1439.44	1439.67	0.23	271-283	VALTGLTVAEYFR
	1601.35	1601.85	0.5	254-268	VALVYGQMNEPPGAR
	1664.29	1663.81	-0.48	215-230	AHGGYSVFAGVGERTR
	1667.25	1666.94	-0.31	269-283	ARVALTGLTVAEYFR
	1677.35	1677.92	0.57	84- 98	LVLEVAQHLGENTVR
	1812.28	1813.07	0.79	396-411	IMDPNIIGAEHYNVAR
	1828.25	1829.11	0.86	254-270	VALVYGQMNEPPGARAR
	1987.26	1988.22	0.96	377-395	AIAELGIYPAVDPLDSTSR
	2075.23	2076.38	1.14	133-151	IINVIGEPIDERGPIPTDK
	2218.25	2219.53	1.28	111-132	GQPVLDSGSPIRIPVGAETLGR
	2268.25	2266.58	-1.67	314-334	IPSAVGYQPTLATDMGTMQER
H+ transporting ATP synthase beta subunit isoform 2	1042.14	1041.25	-0.89	467-475	LVPLEETIK
	1187.08	1186.38	-0.7	24-35	ASLVTGAAVNKR
	1262.57	1262.45	-0.12	96-107	TIAMDGTEGLVR
	1367.61	1367.56	-0.04	130-141	IINVIGEPIDER
	1406.55	1406.52	-0.03	212-225	AHGGYSVFAGVGER
	1435.56	1435.6	0.04	297-310	FTQAGSEVSALLGR
	1601.54	1601.85	0.31	251-265	VALVYGQMNEPPGAR
	1677.55	1677.92	0.37	81- 95	LVLEVAQHLGENTVR
	1987.41	1988.22	0.81	374-392	AIAELGIYPAVDPLDSTSR
		1987.24	-0.17	15- 34	TVVNNATEKASLVTGAAVNK
Actin 3	905.602	905.085	-0.52	314-320	MQKEITR
	923.694	923.123	-0.57	330-337	IIAPPERK
	976.51	976.013	-0.5	20- 29	AGFAGDDAPR
	987.494	988.259	0.76	321-329	LAPSTMKIK
	1036.63	1036.28	-0.35	328-336	IKIIAPPER
	1132.52	1132.19	-0.32	198-207	GYSFTTTAER
	1171.61	1171.41	-0.2	41- 51	HQGVMVGMGQK
	1198.64	1198.43	-0.21	30- 40	AVFPSIVGRPR
		1198.21	-0.44	52- 62	DSYVGDEAQSK
	1355.45	1354.39	-1.06	52- 63	DSYVGDEAQSKR
	1515.5	1515.69	0.2	86- 96	IWHHTFYNELR
	1623.39	1623.89	0.5	179-192	R LDLAGRDLTDYLMK
	1743.45	1744.92	1.47	193-207	ILTERGYSFTTTAER
	1790.43	1790.95	0.51	240-255	SYELPDGQVITIGNER
	1953.52	1954.25	0.74	97-114	VAPEEHPVLLTEAPLNPK
	2093.53	2094.31	0.79	240-257	SYELPDGQVITIGNERFR
	2094.33	2094.31	-0.02	240-257	SYELPDGQVITIGNERFR
	2156.43	2156.43	0	20- 40	AGFAGDDAPRAVFPSIVGRPR
	2214.23	2215.47	1.24	293-313	DLYANTVLSGGTTMYPGIADR
	2294.5	2295.62	1.13	97-117	VAPEEHPVLLTEAPLNPKANR
	2344.21	2343.64	-0.57	292-313	KDLYANTVLSGGTTMYPGIADR
Chaperonin	1020.96	1020.06	-0.9	226-235	EVEGDVSSAK
		1021.22	0.26	496-504	GIIDSYLLK
	1039.04	1038.15	-0.89	45- 54	SAYGPNGMNK
	1102.99	1102.3	-0.7	441-450	FAVALESIPR
	1230.97	1230.47	-0.5	440-450	KFAVALESIPR
	1397.76	1397.61	-0.14	360-371	VVVFKMESSESR
	1478.81	1478.69	-0.12	32- 44	NINACKQFAQSVR
	1652.34	1653	0.66	496-509	GIIDSYLLKFWGIK
	1701.35	1700.89	-0.46	17- 31	DGARMFSGLEEAVYR
	1740.46	1739.09	-1.37	505-520	FWGIKYAVGAATTILK
	1767.39	1768.84	1.45	477-493	NAGFDIDSENNGVCDAK
	1979.77	1978.19	-1.58	451-469	ALADNSGANATEVVNKIYK
Translationally controlled tumor protein	1032.6	1032.16	-0.44	105-113	APDQVEVFK
	1270.58	1270.45	-0.13	74- 84	LVETYAFGDKK
	1392.57	1392.57	0	22- 33	LVDEVIYEVTGR
	1651.53	1651.94	0.42	20- 33	MKLVDEVIYEVTGR
	1861.51	1862.15	0.64	22- 37	LVDEVIYEVTGRLVTR
	1893.43	1894.15	0.72	6-21	DIITGDEMFSDTYKMK
ADP-ribosylation factor-like protein	830.454	830.062	-0.39	1-7	MLALINR
	959.436	959.154	-0.28	60- 68	VTKGNVTIK
	1011.4	1011.17	-0.23	78- 84	FRSMWER
	1130.42	1130.32	-0.11	80- 87	SMWERYCR
	1331.09	1330.51	-0.58	69- 79	VWDIGGQPRFR
	1405.13	1405.68	0.55	156-167	EICCYSISCKEK
	1448.16	1448.77	0.61	8-18	ILDWIKSLFWK
	1635	1635.97	0.97	118-132	QQLTGIPVLVLGNKR
Peritrophic membrane chitin binding protein 2	835.373	835.319	-0.053	114-120	NVECGTR
	1853.91	1853.83	-0.08	170-185	TLSLACPSNLFYDPQK
	1985.87	1985.78	-0.0855	121-138	VVPGEENVNTGPCNCDPK
	2139.05	2138.97	-0.0848	170-181	TLSLACPSNLFYDPQKER
Triacylglycerol lipase	929.34	929.04	-0.3	164-172	ITGLDPSAR
	1045.24	1045.12	-0.12	173-180	DWENNVLR
	1407.12	1407.59	0.46	234-246	AYEVFAATITHGK
	1784.94	1786.02	1.08	202-218	NGLGVAIGHIDFFVNGR
	1802.98	1804.08	1.1	138-155	VHIVGFNLGAHVAGVTGR
	1954.86	1956.14	1.28	164-180	ITGLDPSARDWENNVLR
	2215.67	2217.38	1.71	181-201	LGTNDAQYVEVIHTDGSGVNK
	2367.74	2369.8	2.06	133-155	LPLNKVHIVGFNLGAHVAGVTGR

## Sheet: LC-MS MS analysis
LC-MS/MS analysis of PM trypsic peptides of B.mori
Protein name	MH+	Z	XC	DeltaCn	Overlap/total	Sequence
Chitin deacetylase	1026.17	2	2.4693	0.2855	12/14	FIVTNFER
	1356.71	2	4.6485	0.7263	19/22	GHEIALHSISHR
	1360.65	2	2.6804	0.6508	15/24	CSSTSIPGGLEPR
	1741.93	2	4.2731	0.5454	21/28	VQIAHFANIPFEEVK
	1743	2	2.3588	0.3943	13/28	VQIAHFANIPFEEVK
	2511.72	2	3.0241	0.5401	18/42	TPPSFWAAATYDEIKEEIADQK
	2643.89	2	3.3291	0.5092	16/44	NTPQFVTLTFDDGVNVINVETYR
Signal sequence receptor beta subunit	1336.72	2	3.4653	0.4365	18/20	YLVENMDILVK
	1352.71	2	3.6085	0.4707	17/20	YLVENM*DILVK
	1594.85	2	4.7594	0.5815	24/28	YTLFNVGSAPAVEVK
	2513.2	2	4.9934	0.5468	23/48	ASEDATDVQYSISSAPGEGAIVAFK
	2599.32	3	5.0313	0.4644	29/92	LVDNGFHPDVFTVVGGQLTAEIDR
Juvenile hormone binding protein	994.641	2	3.926	0.3143	15/16	LNLVLAVPR
	1160.57	2	3.326	0.4302	16/18	ADDFSSLHLR
	1161.64	2	3.6721	0.5696	16/18	SNLQINLFGR
	1261.64	2	3.6535	0.6502	21/24	VSASVGSAEGEIR
	1596.83	2	4.4076	0.6358	20/26	IPVYLTDYAAEVSR
Chlorophyllide A binding protein precursor	1304.52	2	3.3522	0.5841	16/18	YFENMDQSDR
	1321.64	2	2.9519	0.4038	16/20	LIESYPSDNQR
	1432.75	2	3.5674	0.4379	16/22	VDVFNTQVINQR
	1611.72	2	3.3346	0.378	19/26	YPTPFQEGTCANAR
	1774.88	2	5.0277	0.5694	22/26	YLGLWYNIESYPTR
	1774.88	2	3.745	0.4906	22/26	YLGLWYNIESYPTR
	1793.93	2	3.676	0.5946	19/34	LESINGFAVLATTDGSAK
	1793.93	2	4.6544	0.6747	23/34	LESINGFAVLATTDGSAK
	1851.87	2	4.8605	0.5905	21/30	GQCETITGVQNFDVQR
	2079.07	2	5.2406	0.6324	23/36	YSLTGGTVDVINTEVINQR
	2173.15	2	4.8341	0.6846	25/42	VLNQNLNTITGTATLAADGSAK
	3083.56	3	4.3121	0.4272	34/108	ACFHLPNLAPGEPVILPGQCDPNINAIR
